# Supplementary material for: Milk-derived bioactive peptides protect against oxidative stress in a Caco-2 cell model
Source: Royal Society of Chemistry journal article supplement (doi:10.1039/c7fo01646h), 2018-01-01
Supplement: c7fo01646h1.pdf [file c7fo01646h1.pdf]

## Electronic supplementary information (ESI)

### Milk-derived bioactive peptides protect against oxidative stress in a Caco-2 cell model

F. Tonolo<sup>a</sup>, M. Sandre<sup>a</sup>, S. Ferro<sup>a</sup>, A. Folda<sup>a</sup>, V. Scalcon<sup>a</sup>, G. Scutari<sup>a</sup>, E. Feller<sup>b</sup>, O. Marin<sup>a</sup>, A. Bindoli<sup>c\*</sup> and M.P. Rigobello<sup>a\*</sup>

<sup>a</sup> University of Padova, Department of Biomedical Sciences, Padova, Italy.

<sup>b</sup> Centrale del Latte di Vicenza S.p.A., Vicenza, Italy.

<sup>c</sup> Institute of Neuroscience, CNR, Padova, Italy.

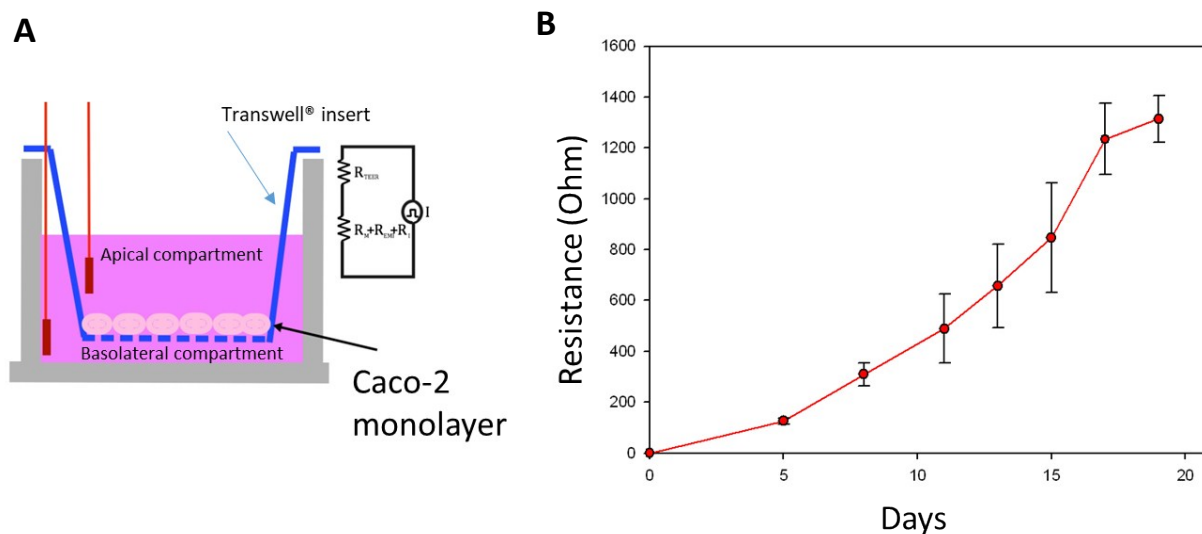

**Fig. 1.** TEER measurement during Caco-2 cells differentiation. Cells were seeded onto a Transwell® insert (A) and the integrity of the monolayer was assessed evaluating TEER values, using Millicell® ERS-2 volt-ohmmeter (Millipore) (B).

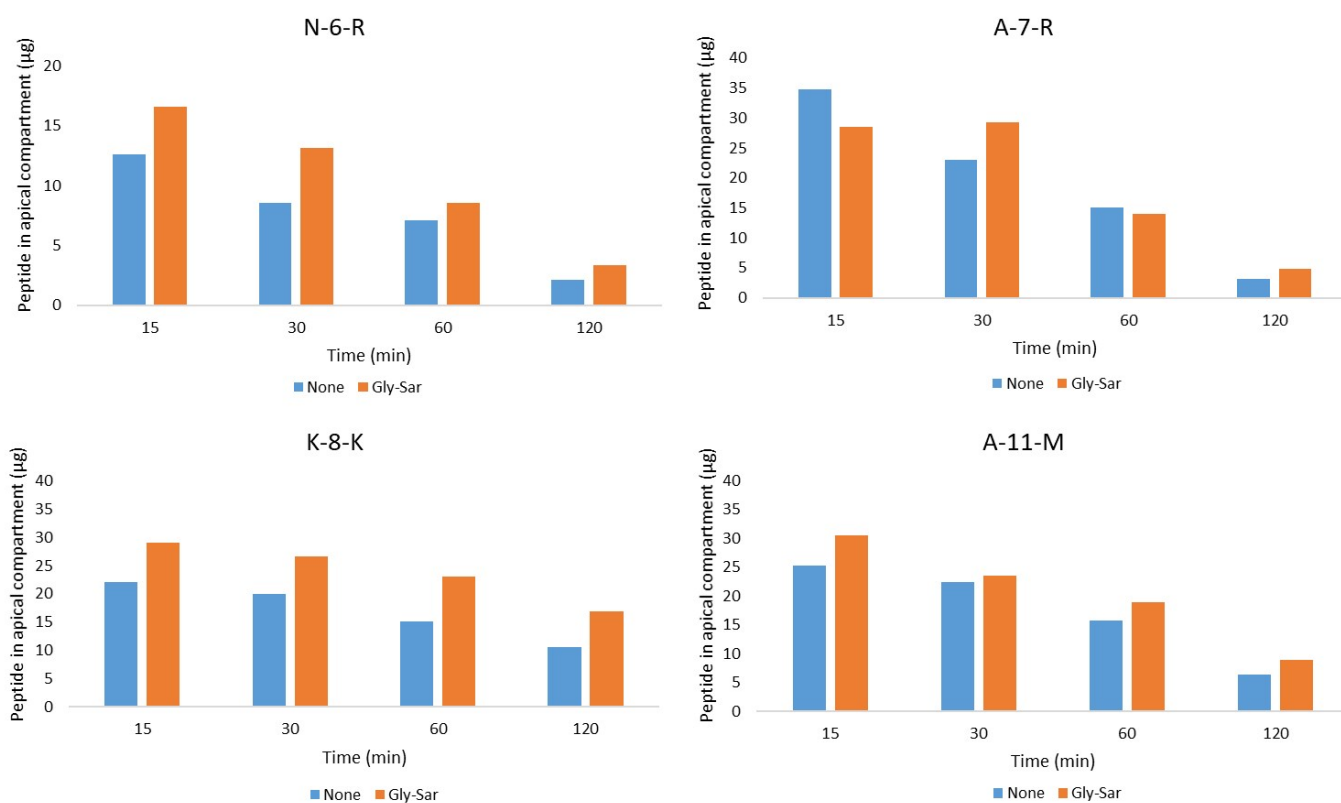

**Fig. 2.** Caco-2 epithelium crossing capacity of peptides (0.1 mg/mL) in presence of 10 mM Gly-Sar.

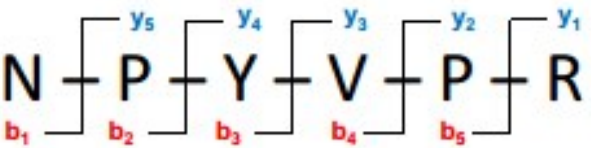

4700 MS/MS Precursor 745.35 Spec #1 MC[BP = 745.9, 463]

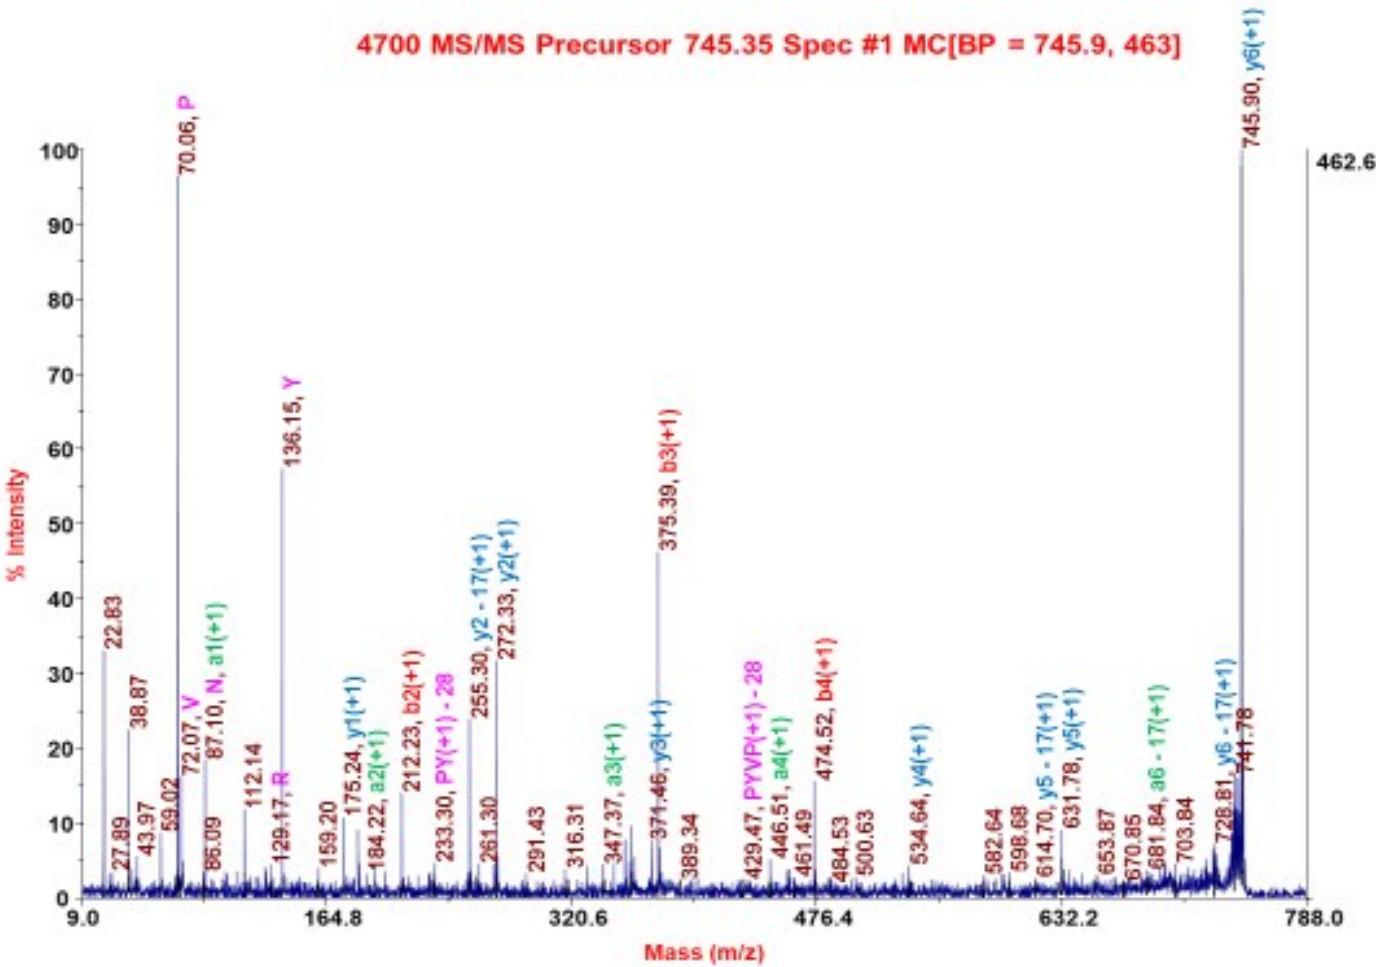

| #1 | b <sup>+</sup> | Seq. | y <sup>+</sup> | #2 |
|----|----------------|------|----------------|----|
| 1  | 115.11116      | N    | 745.85580      | 6  |
| 2  | 212.22784      | P    | 631.75196      | 5  |
| 3  | 375.40380      | Y    | 534.63528      | 4  |
| 4  | 474.53636      | V    | 371.45932      | 3  |
| 5  | 571.65304      | P    | 272.32676      | 2  |
| 6  | 727.84052      | R    | 175.21008      | 1  |

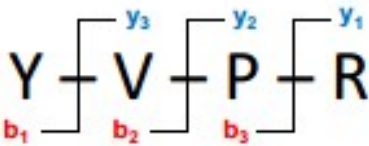

4700 MS/MS Precursor 534.25 Spec #1 MC[BP = 255.9, 1054]

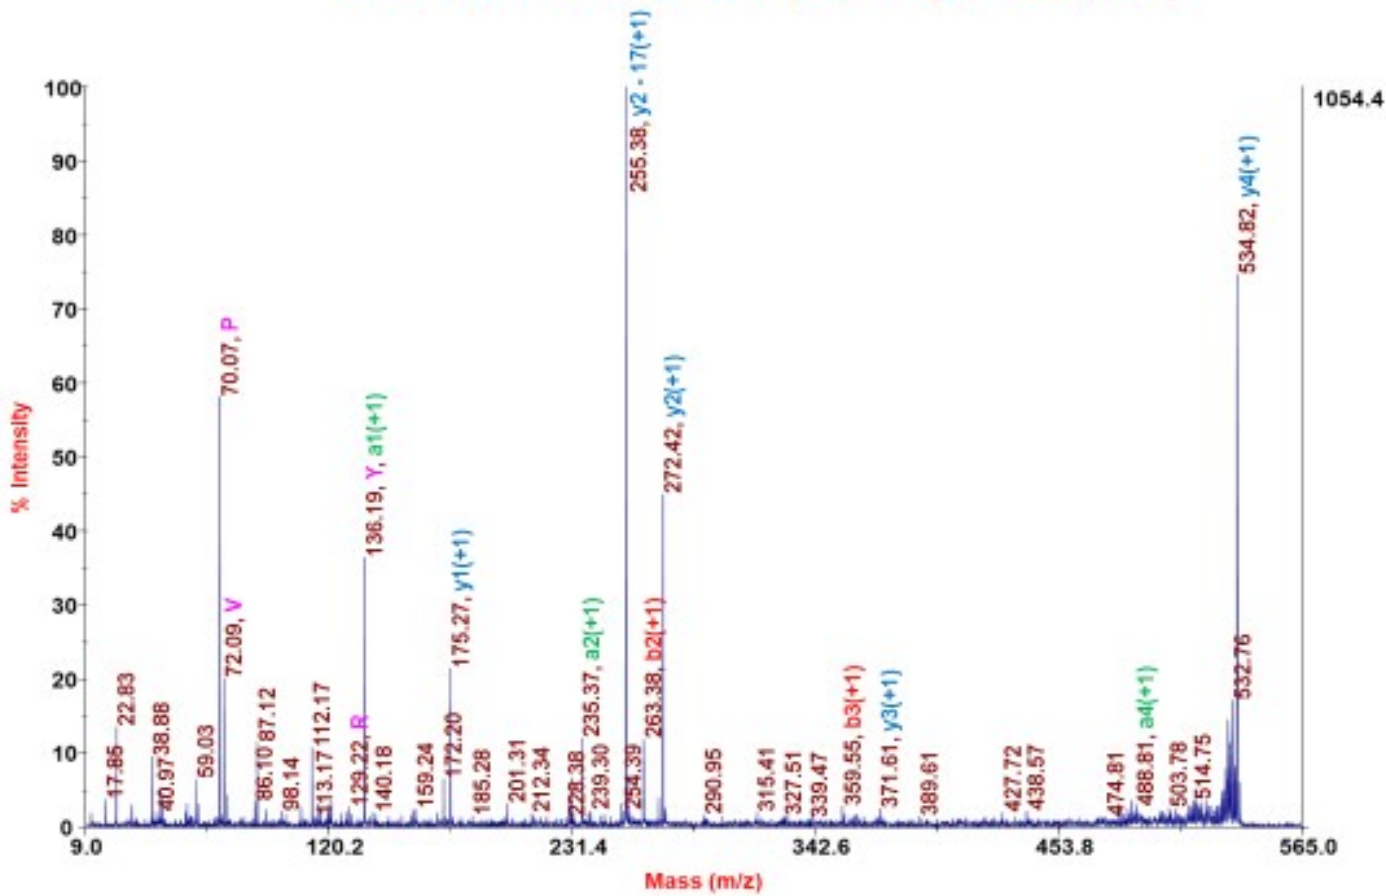

| #1 | b <sup>+</sup> | Seq. | y <sup>+</sup> | #2 |
|----|----------------|------|----------------|----|
| 1  | 164.18328      | Y    | 534.63528      | 4  |
| 2  | 263.31584      | V    | 371.45932      | 3  |
| 3  | 360.43252      | P    | 272.32676      | 2  |
| 4  | 516.62000      | R    | 175.21008      | 1  |

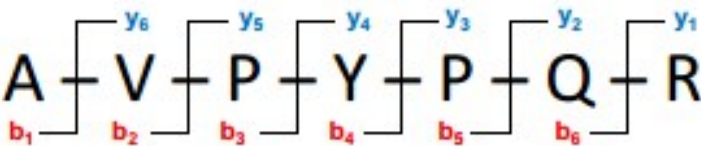

4700 MS/MS Precursor 830.39 Spec #1 MC[BP = 830.9, 443]

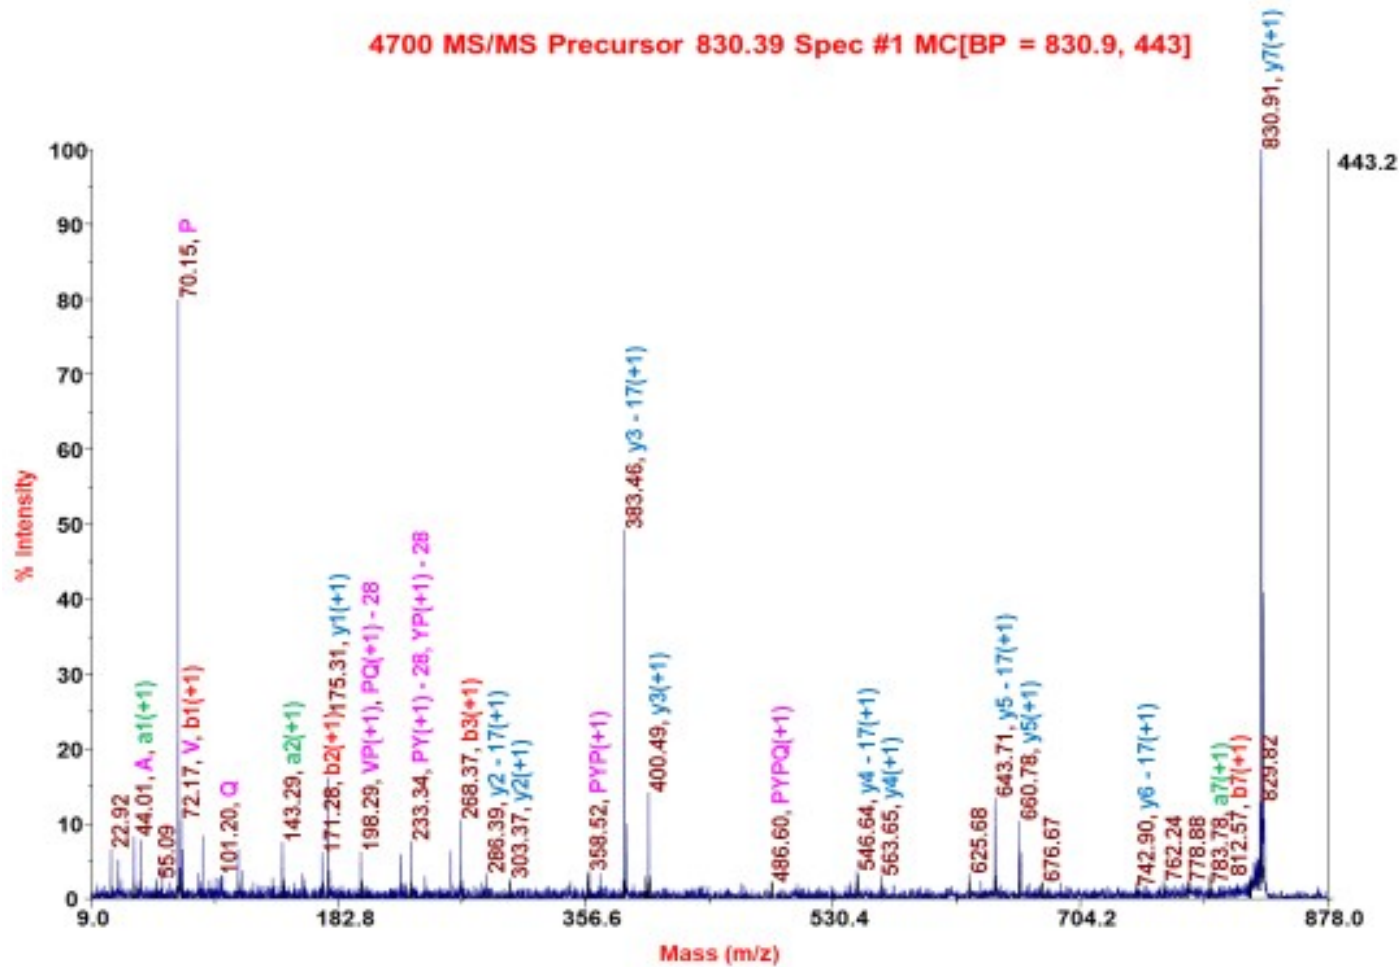

| #1 | b <sup>+</sup> | Seq. | y <sup>+</sup> | #2 |
|----|----------------|------|----------------|----|
| 1  | 72.08612       | A    | 830.96148      | 7  |
| 2  | 171.21868      | V    | 759.88268      | 6  |
| 3  | 268.33536      | P    | 660.75012      | 5  |
| 4  | 431.51132      | Y    | 563.63344      | 4  |
| 5  | 528.62800      | P    | 400.45748      | 3  |
| 6  | 656.75872      | Q    | 303.34080      | 2  |
| 7  | 812.94620      | R    | 175.21008      | 1  |

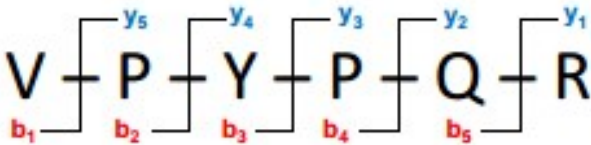

4700 MS/MS Precursor 759.36 Spec #1 MC[BP = 759.9, 2352]

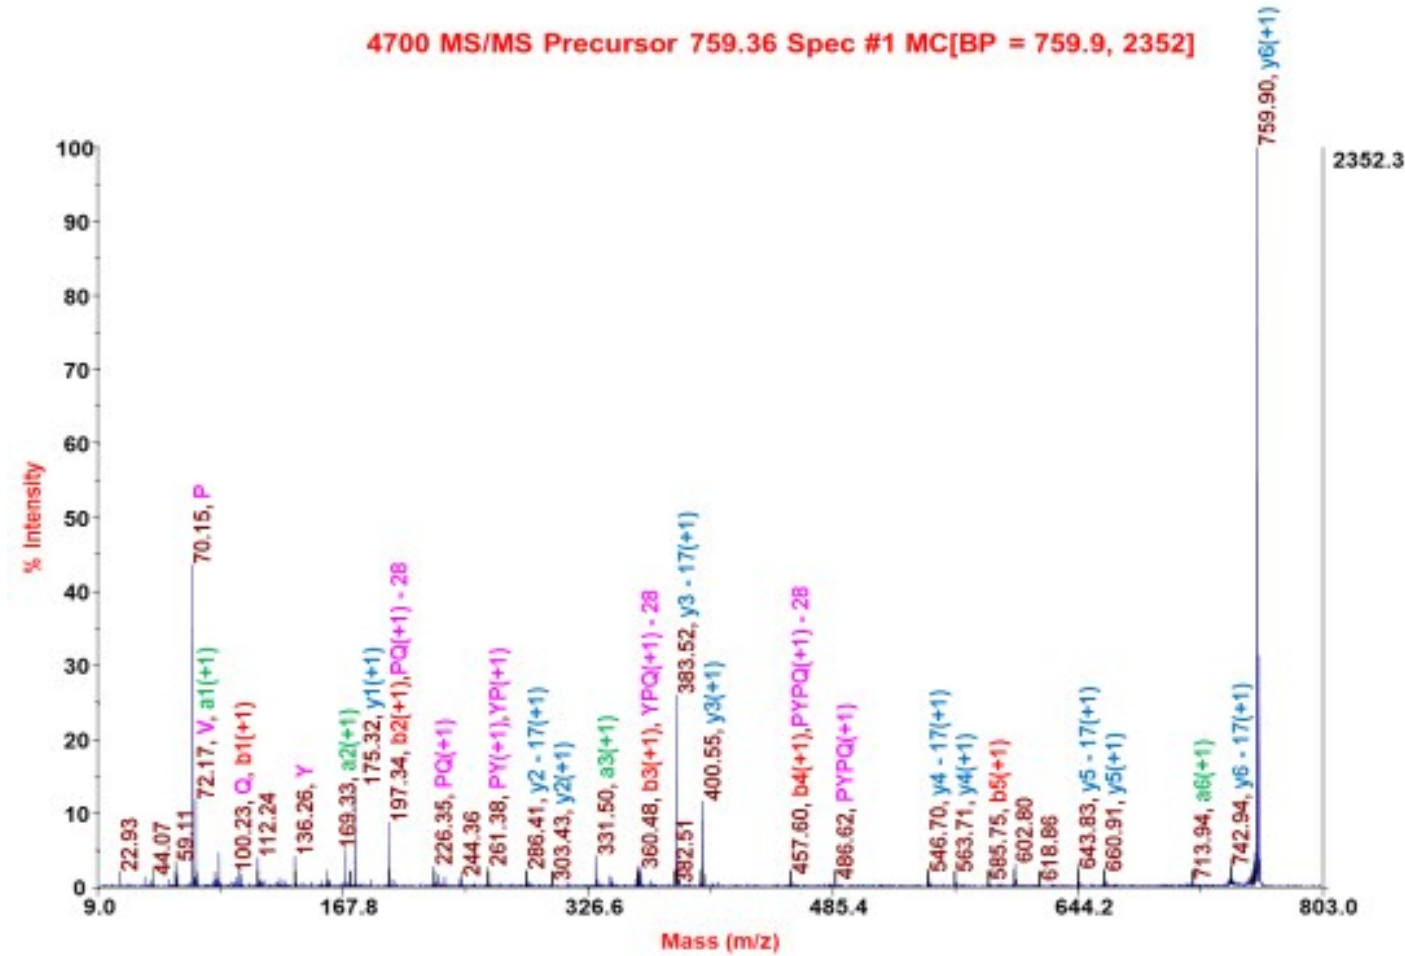

| #1 | b <sup>+</sup> | Seq. | y <sup>+</sup> | #2 |
|----|----------------|------|----------------|----|
| 1  | 100.13988      | V    | 759.88268      | 6  |
| 2  | 197.25656      | P    | 660.75012      | 5  |
| 3  | 360.43252      | Y    | 563.63344      | 4  |
| 4  | 457.54920      | P    | 400.45748      | 3  |
| 5  | 585.67992      | Q    | 303.34080      | 2  |
| 6  | 741.86740      | R    | 175.21008      | 1  |



Y-4-R

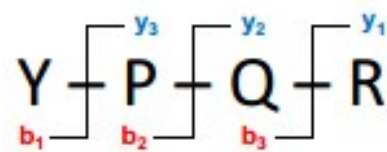

4700 MS/MS Precursor 563.24 Spec #1 MC[BP = 563.8, 555]

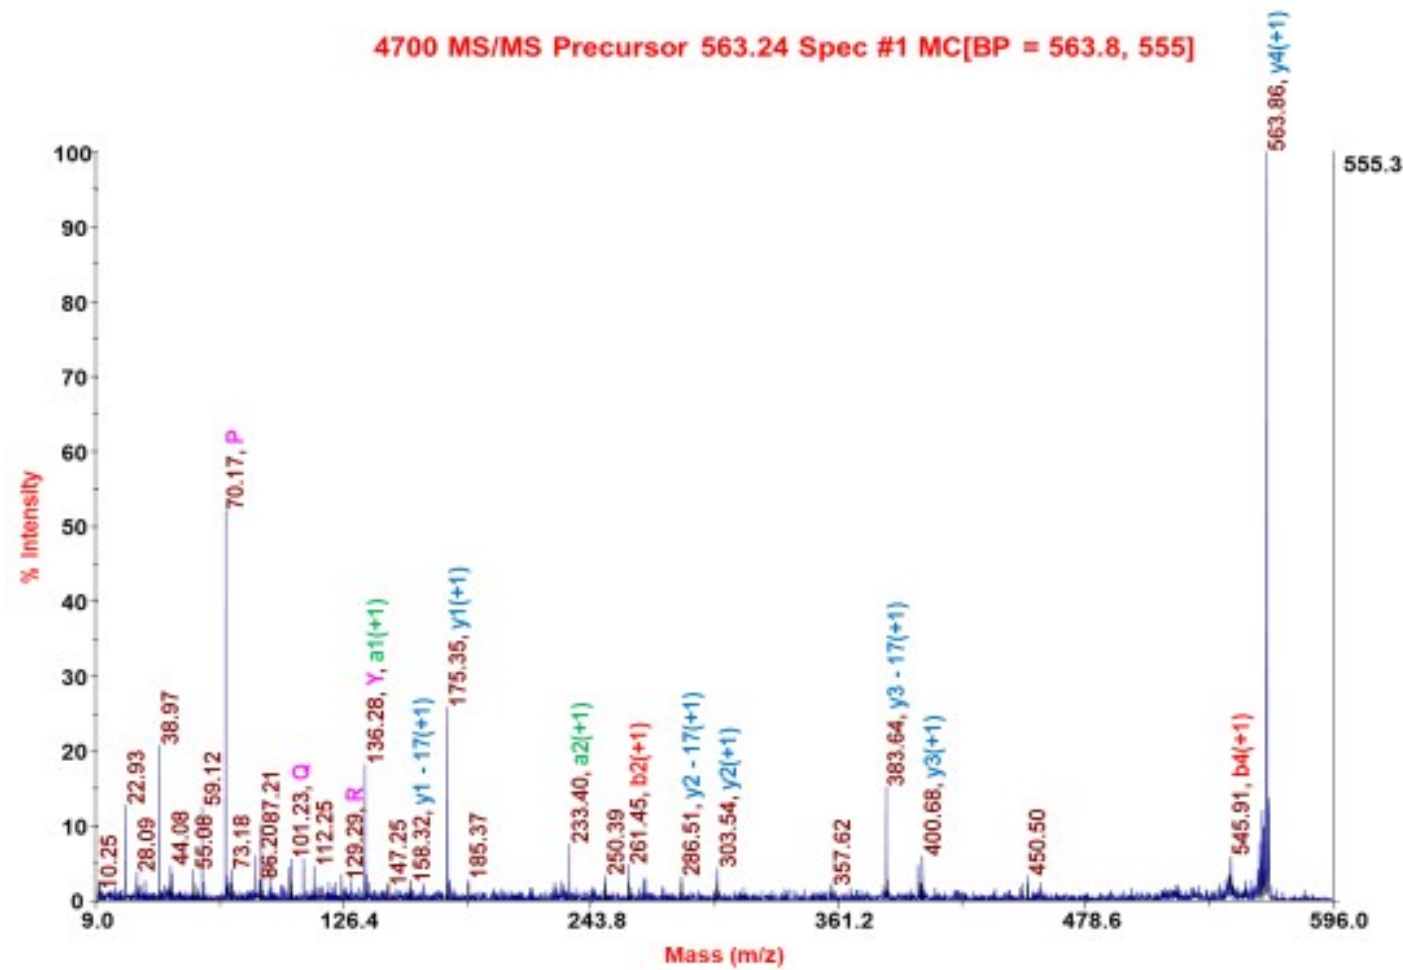

| #1 | b <sup>+</sup> | Seq. | y <sup>+</sup> | #2 |
|----|----------------|------|----------------|----|
| 1  | 164.18328      | Y    | 563.63344      | 4  |
| 2  | 261.29996      | P    | 400.45748      | 3  |
| 3  | 389.43068      | Q    | 303.34080      | 2  |
| 4  | 545.61816      | R    | 175.21008      | 1  |

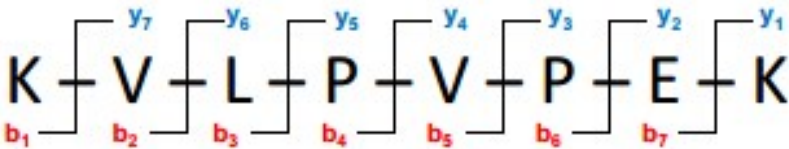

4700 MS/MS Precursor 909.64 Spec #1 MC[BP = 910.0, 3028]

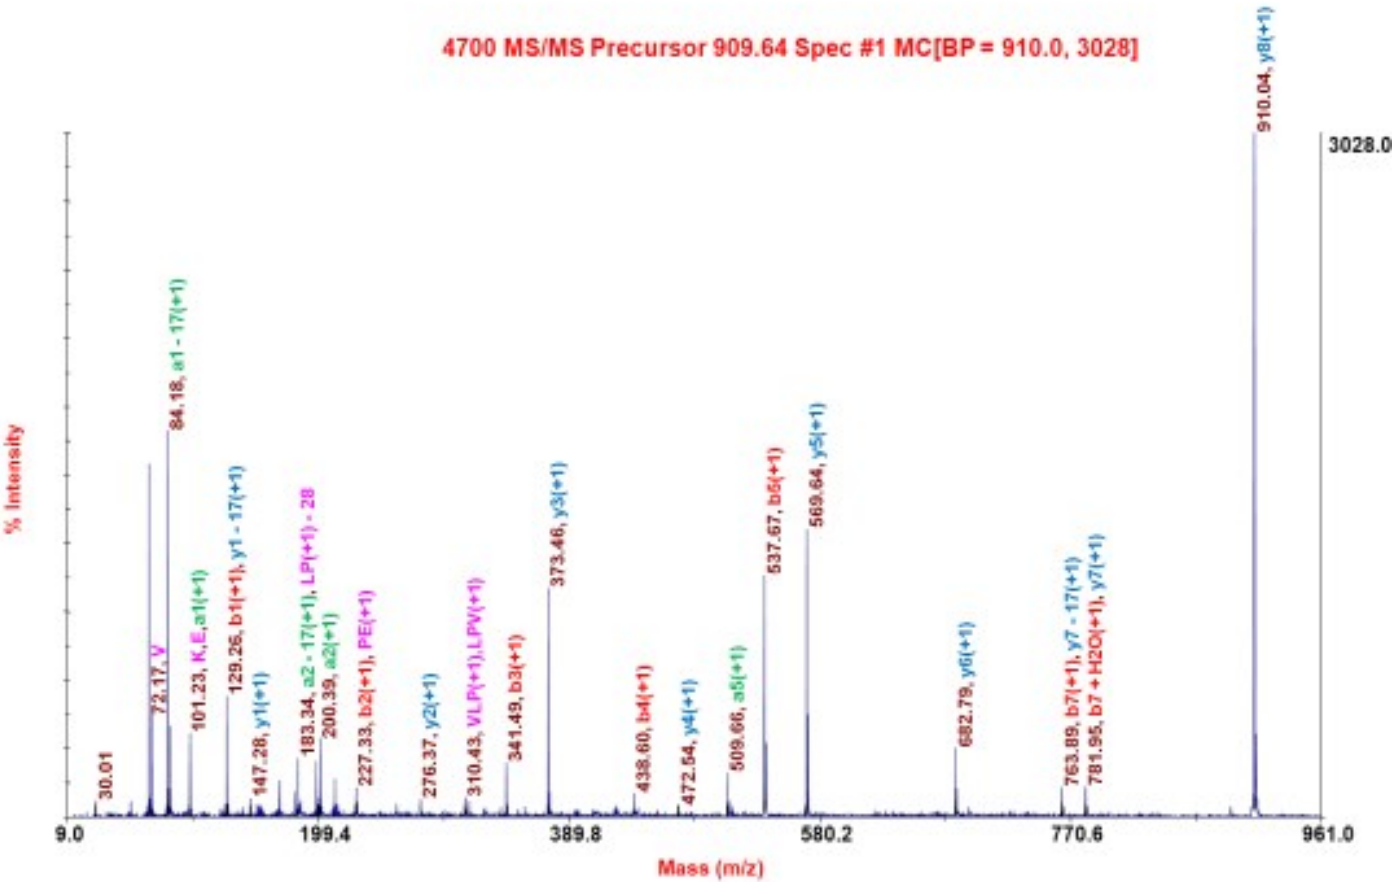

| #1 | b <sup>+</sup> | Seq. | y <sup>+</sup> | #2 |
|----|----------------|------|----------------|----|
| 1  | 129.18140      | K    | 910.14416      | 8  |
| 2  | 228.31396      | V    | 781.97008      | 7  |
| 3  | 341.47340      | L    | 682.83752      | 6  |
| 4  | 438.59008      | P    | 569.67808      | 5  |
| 5  | 537.72264      | V    | 472.56140      | 4  |
| 6  | 634.83932      | P    | 373.42884      | 3  |
| 7  | 763.95480      | E    | 276.31216      | 2  |
| 8  | 892.12888      | K    | 147.19668      | 1  |



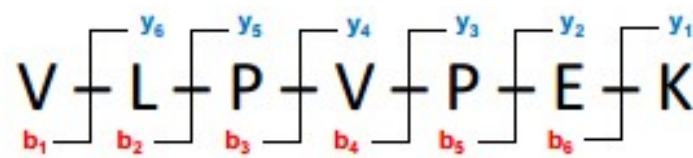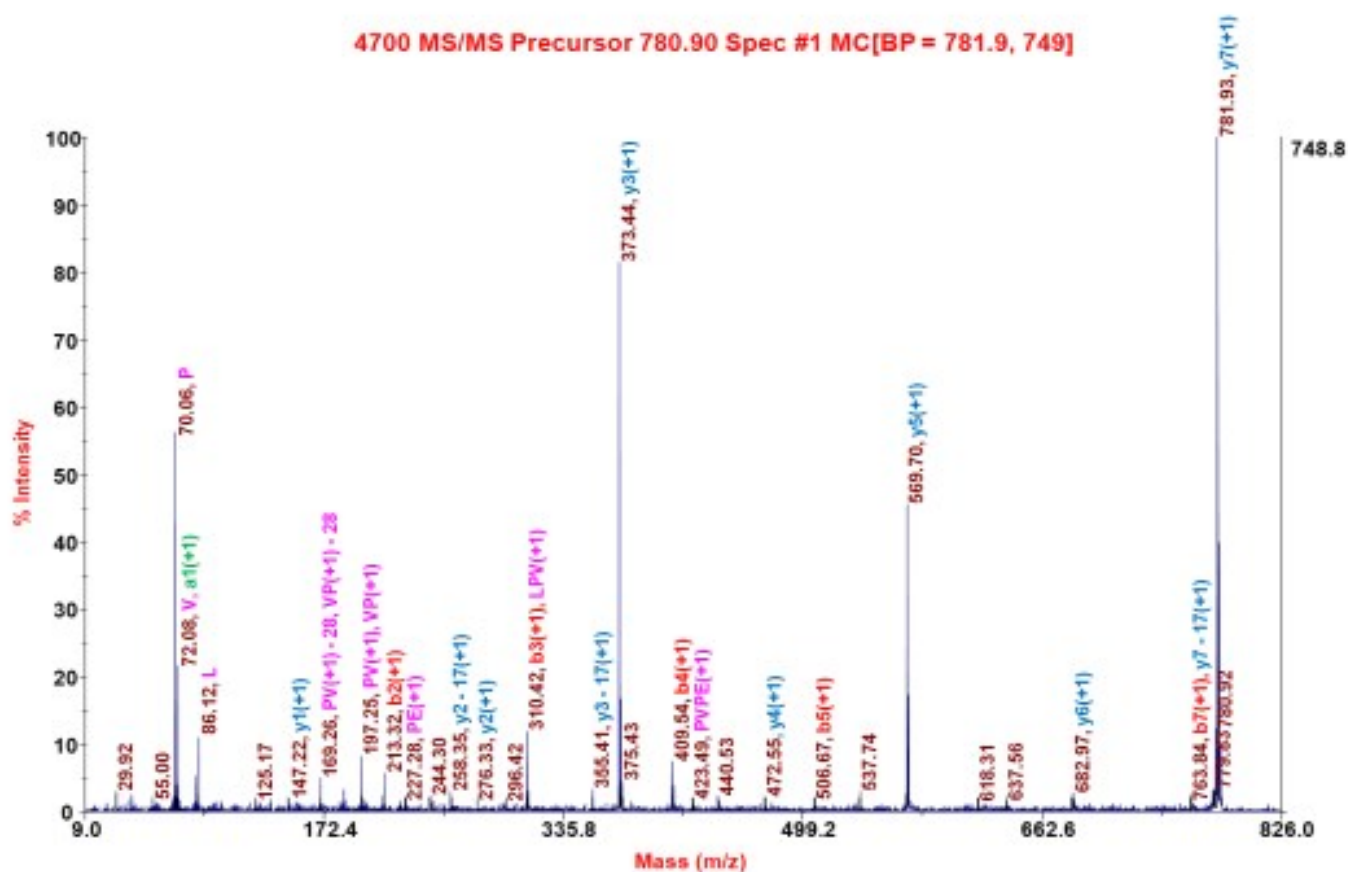

| #1 | b <sup>+</sup> | Seq. | y <sup>+</sup> | #2 |
|----|----------------|------|----------------|----|
| 1  | 100.13988      | V    | 781.97008      | 7  |
| 2  | 213.29932      | L    | 682.83752      | 6  |
| 3  | 310.41600      | P    | 569.67808      | 5  |
| 4  | 409.54856      | V    | 472.56140      | 4  |
| 5  | 506.66524      | P    | 373.42884      | 3  |
| 6  | 635.78072      | E    | 276.31216      | 2  |
| 7  | 763.95480      | K    | 147.19668      | 1  |

# A-11-M

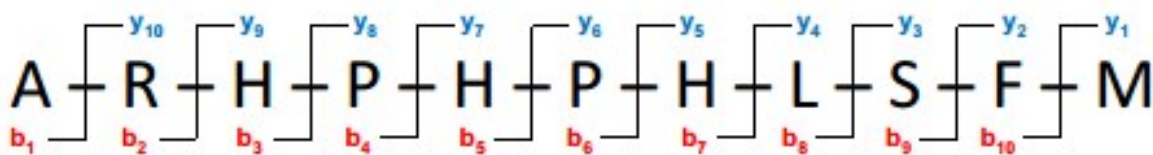

4700 MS/MS Precursor 1329.58 Spec #1 MC[BP = 110.5, 1747]

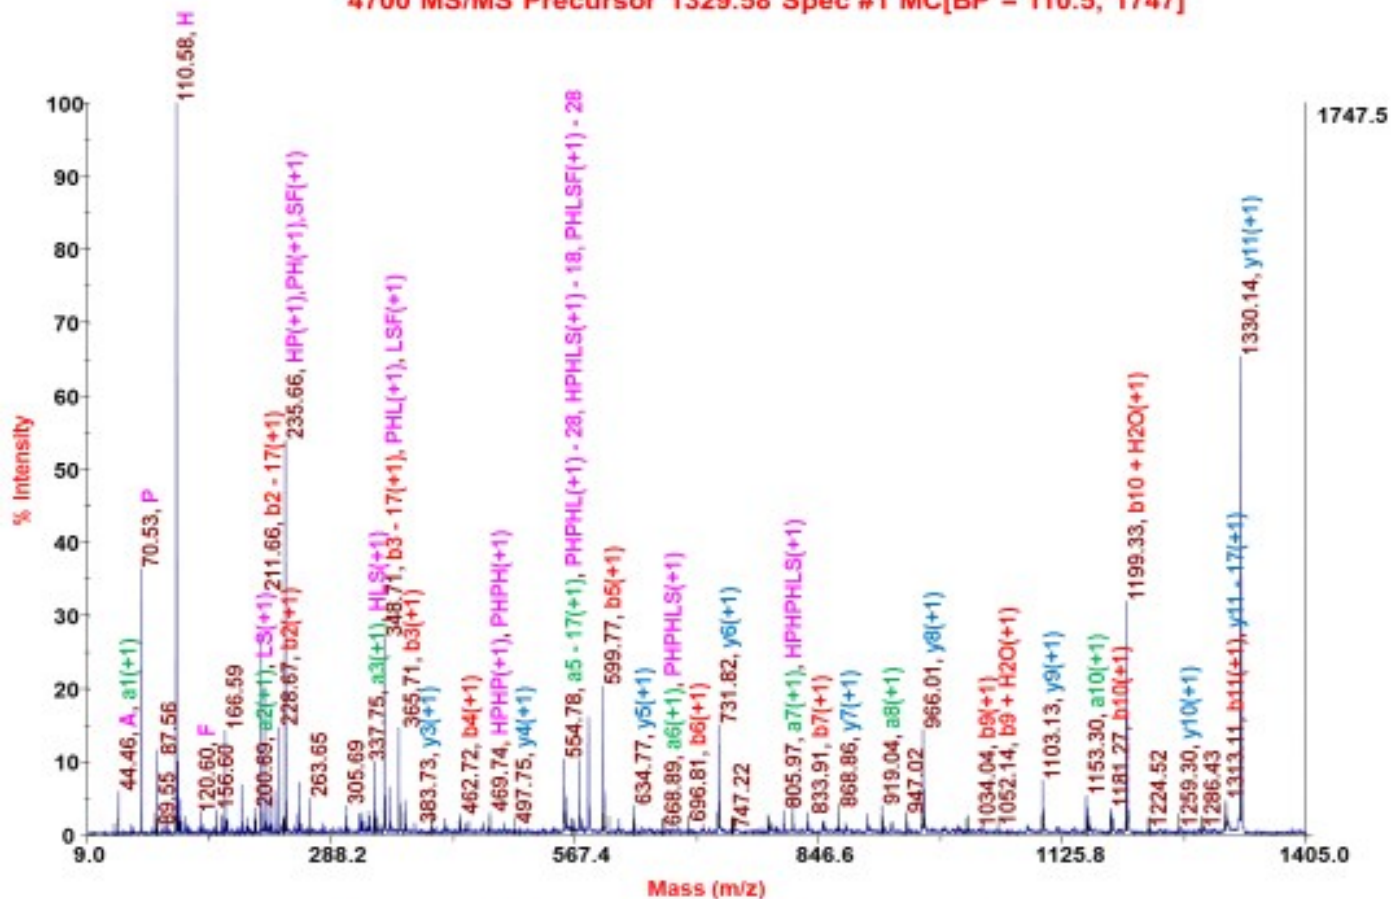

| #1 | b*         | Seq. | y*         | #2 |
|----|------------|------|------------|----|
| 1  | 72.08612   | A    | 1330.55224 | 11 |
| 2  | 228.27360  | R    | 1259.47344 | 10 |
| 3  | 365.41468  | H    | 1103.28596 | 9  |
| 4  | 462.53136  | P    | 966.14488  | 8  |
| 5  | 599.67244  | H    | 869.02820  | 7  |
| 6  | 696.78912  | P    | 731.88712  | 6  |
| 7  | 833.93020  | H    | 634.77044  | 5  |
| 8  | 947.08964  | L    | 497.62936  | 4  |
| 9  | 1034.16784 | S    | 384.46992  | 3  |
| 10 | 1181.34440 | F    | 297.39172  | 2  |
| 11 | 1312.53696 | M    | 150.21516  | 1  |

**A-11-M(ox)**

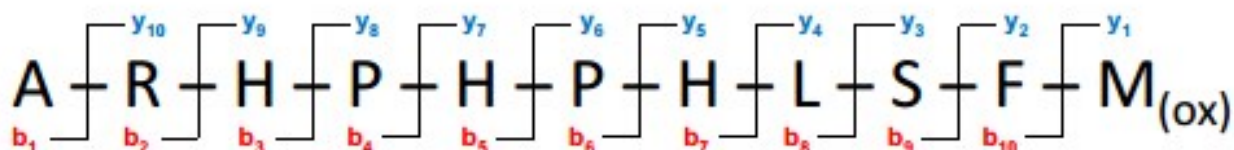

4700 MS/MS Precursor 1345.63 Spec #1 MC[BP = 1282.5, 734]

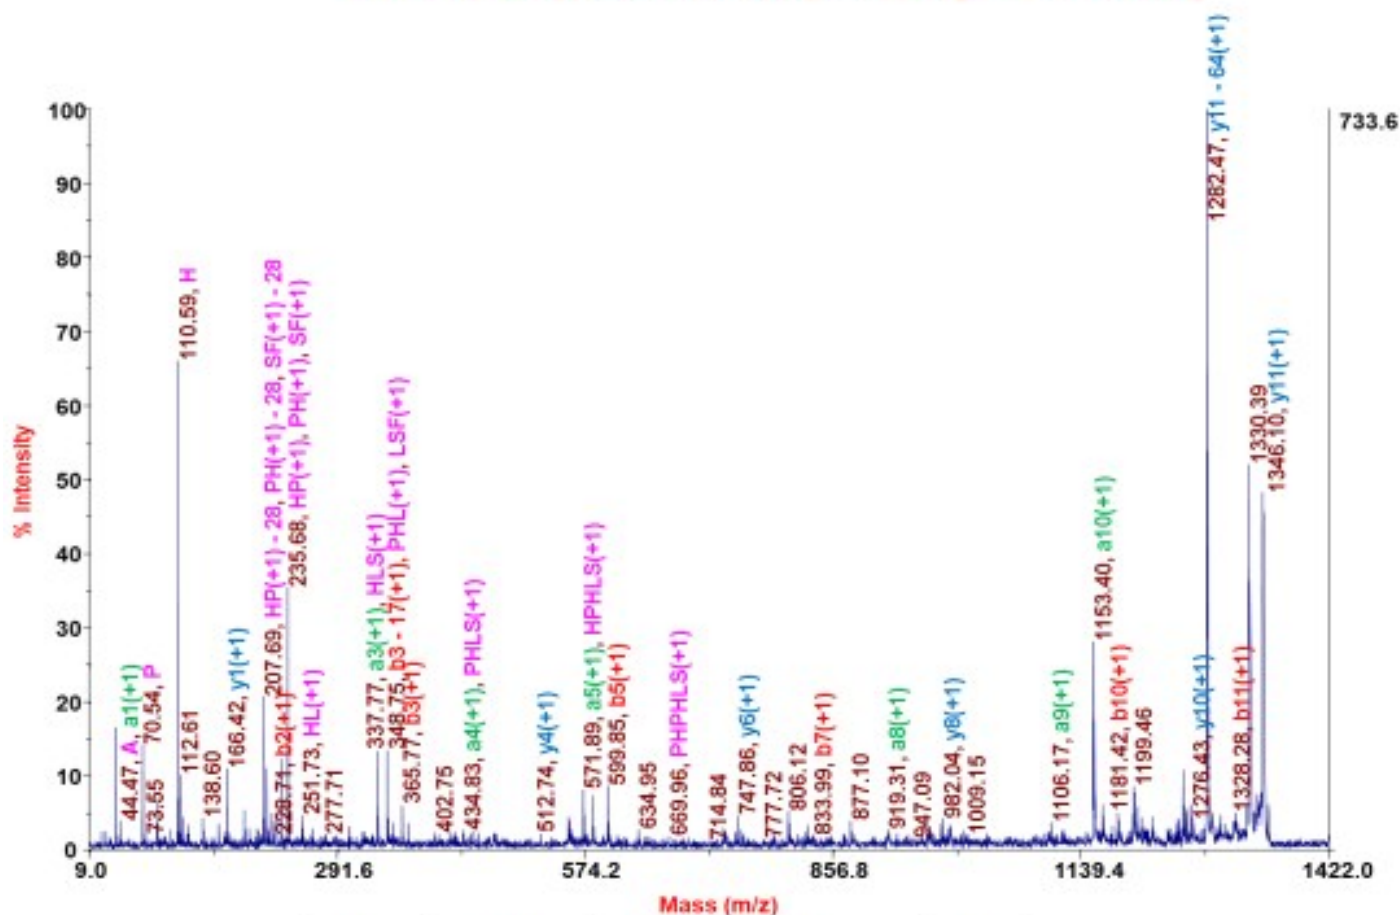

| #1 | b <sup>+</sup> | Seq.  | y <sup>+</sup> | #2 |
|----|----------------|-------|----------------|----|
| 1  | 72.08612       | A     | 1346.54224     | 11 |
| 2  | 228.27360      | R     | 1275.46344     | 10 |
| 3  | 365.41468      | H     | 1119.27596     | 9  |
| 4  | 462.53136      | P     | 982.13488      | 8  |
| 5  | 599.67244      | H     | 885.01820      | 7  |
| 6  | 696.78912      | P     | 747.87712      | 6  |
| 7  | 833.93020      | H     | 650.76044      | 5  |
| 8  | 947.08964      | L     | 513.61936      | 4  |
| 9  | 1034.16784     | S     | 400.45992      | 3  |
| 10 | 1181.34440     | F     | 313.38172      | 2  |
| 11 | 1328.52696     | M(ox) | 166.20516      | 1  |



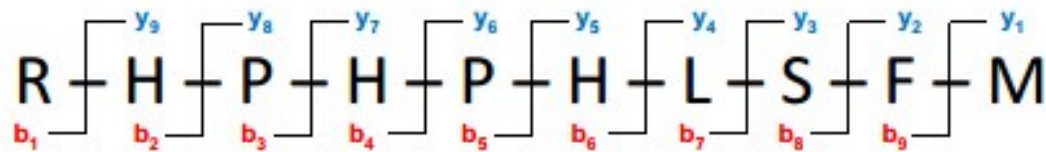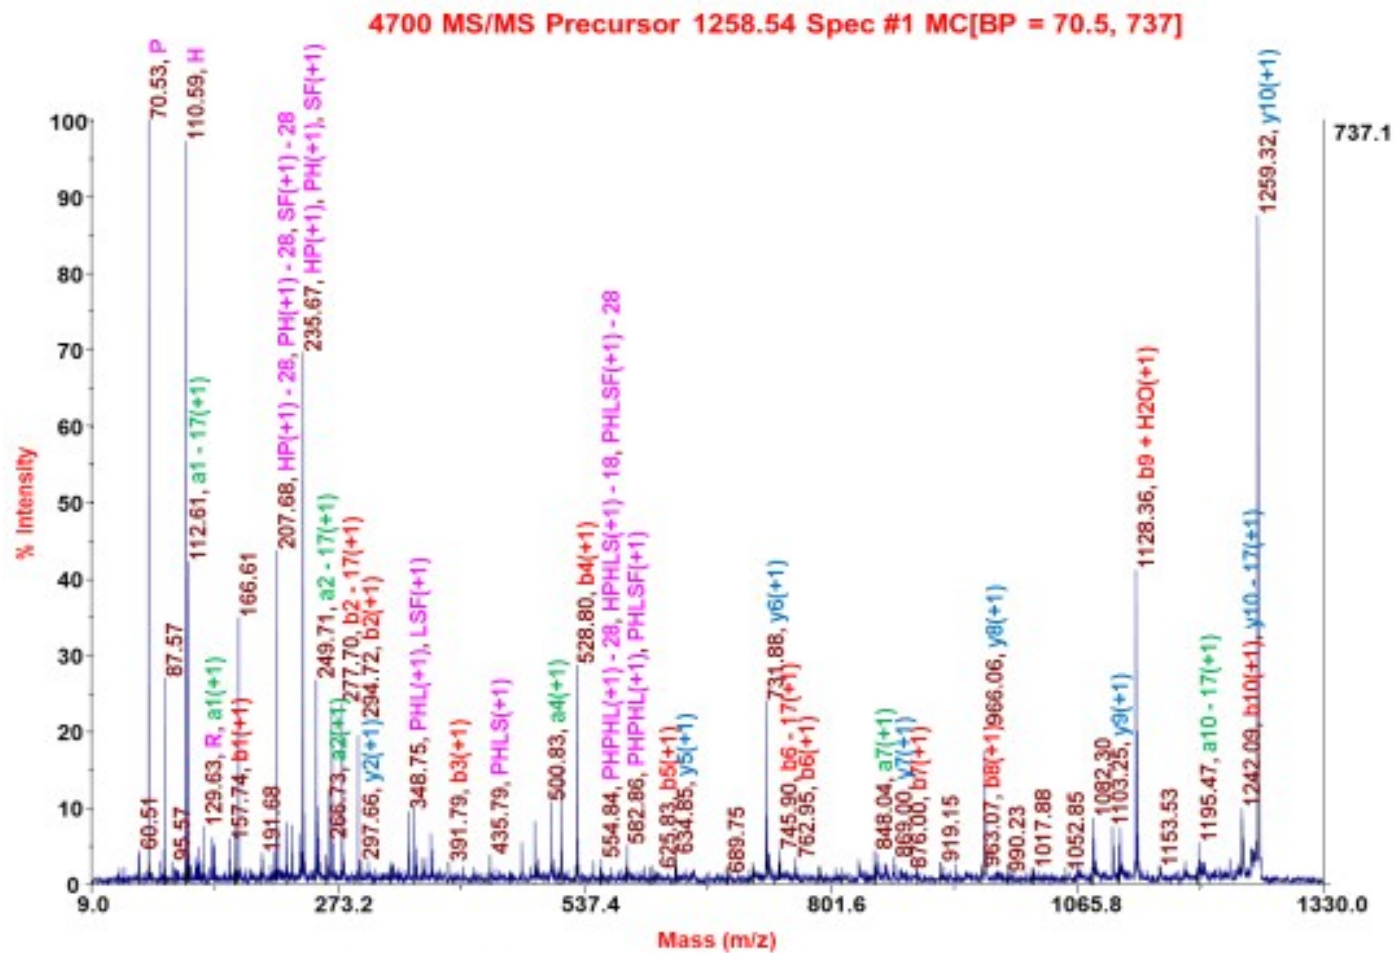

| #1 | b <sup>+</sup> | Seq. | y <sup>+</sup> | #2 |
|----|----------------|------|----------------|----|
| 1  | 157.19480      | R    | 1259.47344     | 10 |
| 2  | 294.33588      | H    | 1103.28596     | 9  |
| 3  | 391.45256      | P    | 966.14488      | 8  |
| 4  | 528.59364      | H    | 869.02820      | 7  |
| 5  | 625.71032      | P    | 731.88712      | 6  |
| 6  | 762.85140      | H    | 634.77044      | 5  |
| 7  | 876.01084      | L    | 497.62936      | 4  |
| 8  | 963.08904      | S    | 384.46992      | 3  |
| 9  | 1110.26560     | F    | 297.39172      | 2  |
| 10 | 1241.45816     | M    | 150.21516      | 1  |

H-9-M

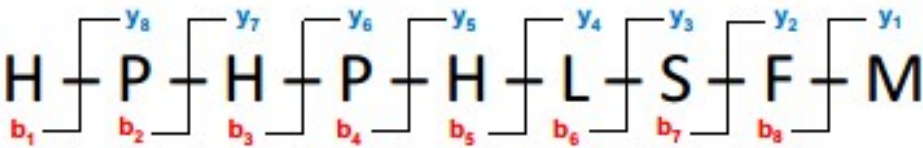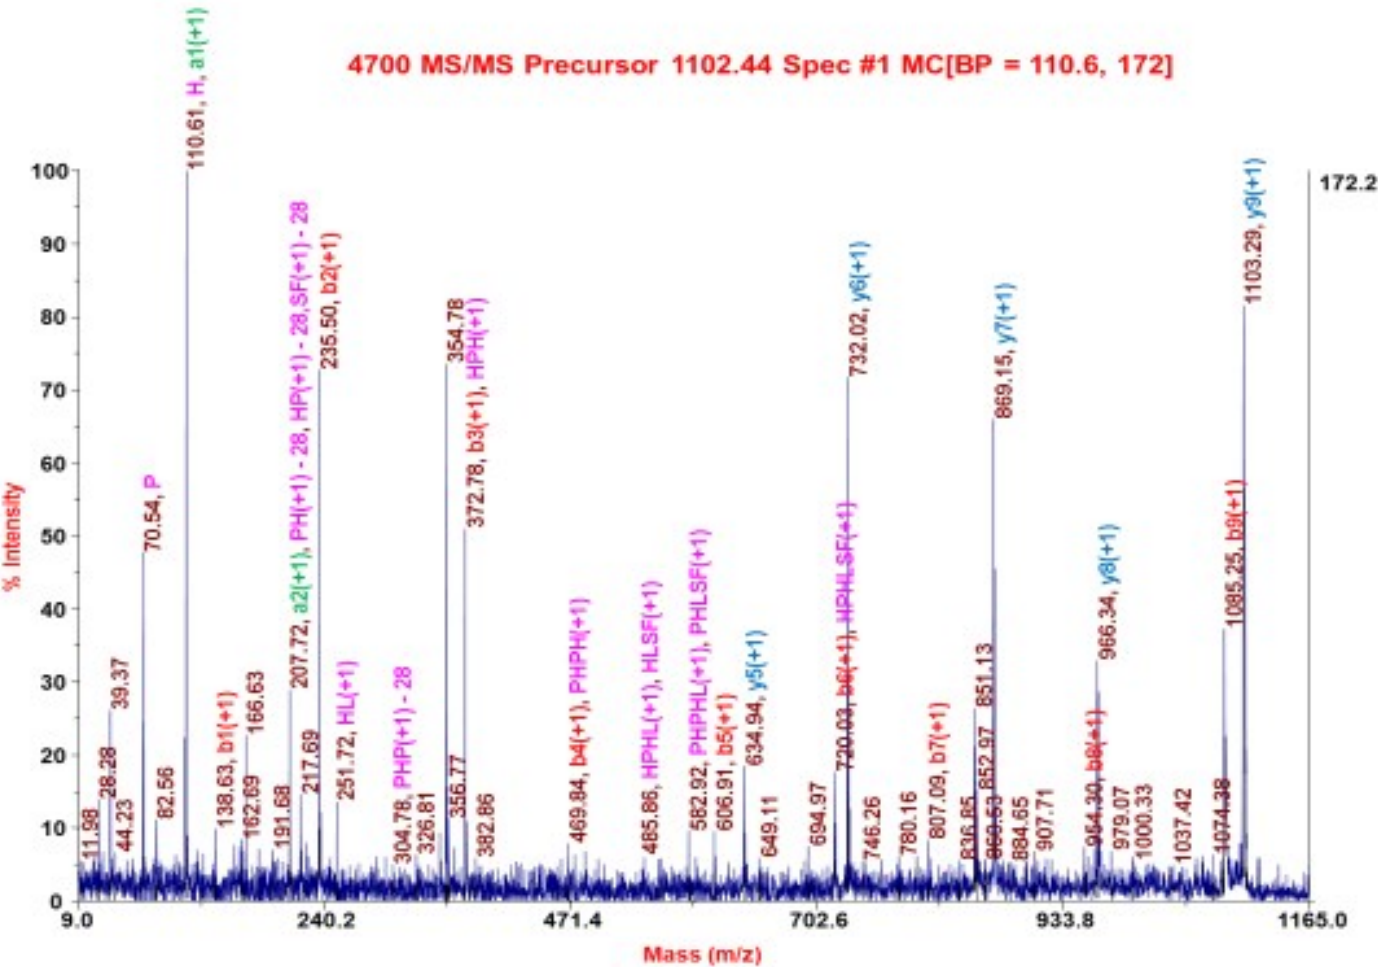

| #1 | b <sup>+</sup> | Seq. | y <sup>+</sup> | #2 |
|----|----------------|------|----------------|----|
| 1  | 138.24840      | H    | 1103.28596     | 9  |
| 2  | 235.26508      | P    | 966.14488      | 8  |
| 3  | 372.40616      | H    | 869.02820      | 7  |
| 4  | 469.52284      | P    | 731.88712      | 6  |
| 5  | 606.66392      | H    | 634.77044      | 5  |
| 6  | 719.82336      | L    | 497.62936      | 4  |
| 7  | 806.90156      | S    | 384.46992      | 3  |
| 8  | 954.07812      | F    | 297.39172      | 2  |
| 9  | 1085.27068     | M    | 150.21516      | 1  |

H-7-M

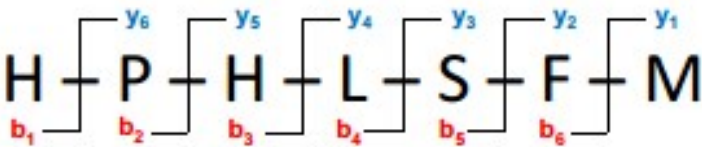

4700 MS/MS Precursor 868.38 Spec #1 MC[BP = 635.1, 190]

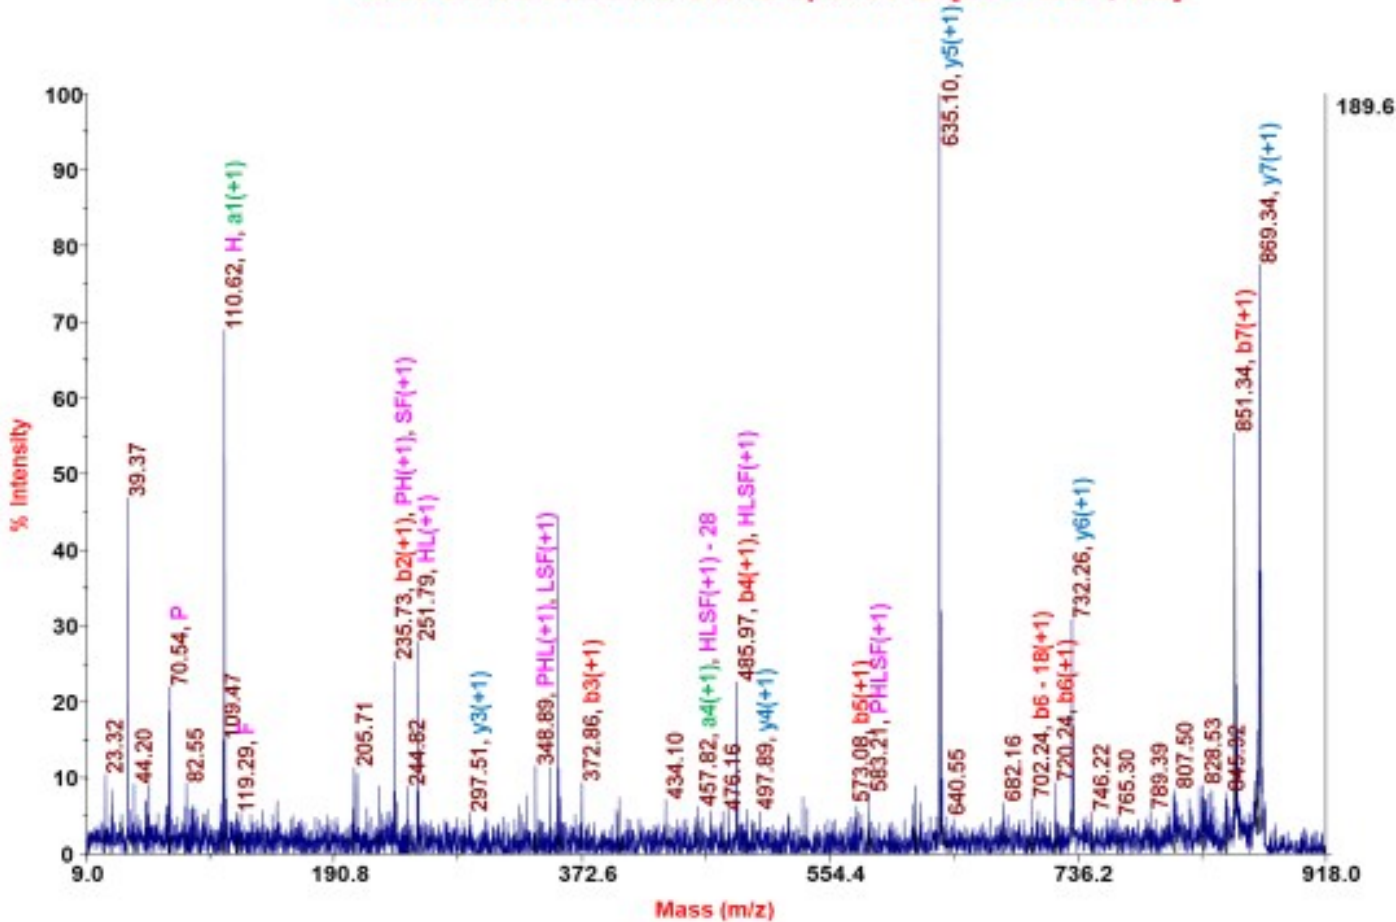

| #1 | b <sup>+</sup> | Seq. | y <sup>+</sup> | #2 |
|----|----------------|------|----------------|----|
| 1  | 138.14840      | H    | 869.02820      | 7  |
| 2  | 235.26508      | P    | 731.88712      | 6  |
| 3  | 372.40616      | H    | 634.77044      | 5  |
| 4  | 485.56560      | L    | 497.62936      | 4  |
| 5  | 572.64380      | S    | 384.46992      | 3  |
| 6  | 719.82036      | F    | 297.39172      | 2  |
| 7  | 851.01292      | M    | 150.21516      | 1  |



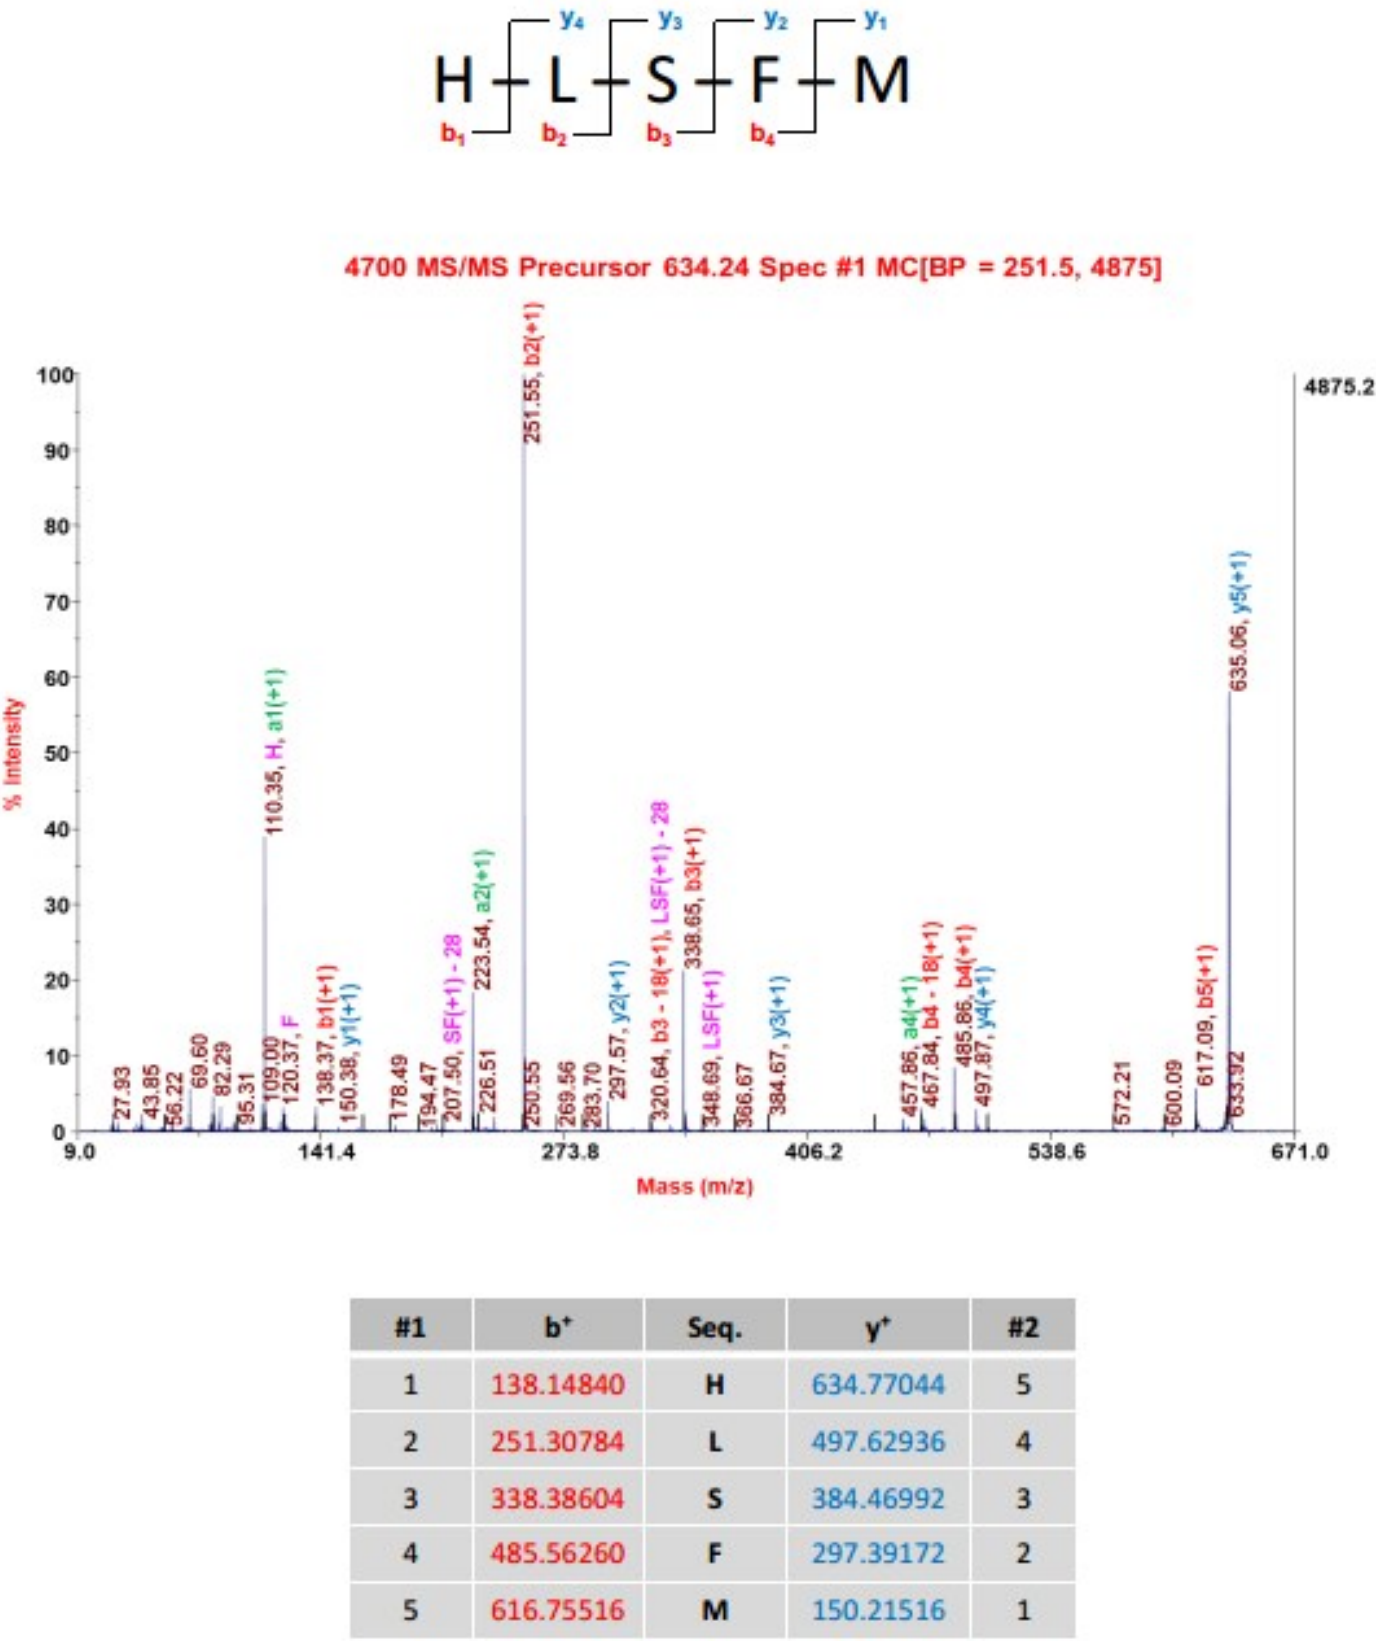

**Fig. 3.** MS/MS sequencing of peptides identified in basolateral MS analysis. The expected mass of each a,b,y ions and internal fragments were calculated and identified by Data Explorer (AB Sciex). In each table are highlighted in red or blue the identified b or y ions; in black the ions not detected.
